# Supplementary material
Source: PubMed Central journal article supplement (PMC7196424)
Supplement: mmc1.pdf [file mmc1.pdf]

**Immunity, Volume 52**

## **Supplemental Information**

### **Detection of SARS-CoV-2-Specific**

### **Humoral and Cellular Immunity**

### **in COVID-19 Convalescent Individuals**

**Ling Ni, Fang Ye, Meng-Li Cheng, Yu Feng, Yong-Qiang Deng, Hui Zhao, Peng Wei, Jiwan Ge, Mengting Gou, Xiaoli Li, Lin Sun, Tianshu Cao, Pengzhi Wang, Chao Zhou, Rongrong Zhang, Peng Liang, Han Guo, Xinquan Wang, Cheng-Feng Qin, Fang Chen, and Chen Dong**

## Supplemental information

### Supplemental data items

Figure S1 Expression and purification of recombinant proteins. Related to Figure 1, 2 and 3.

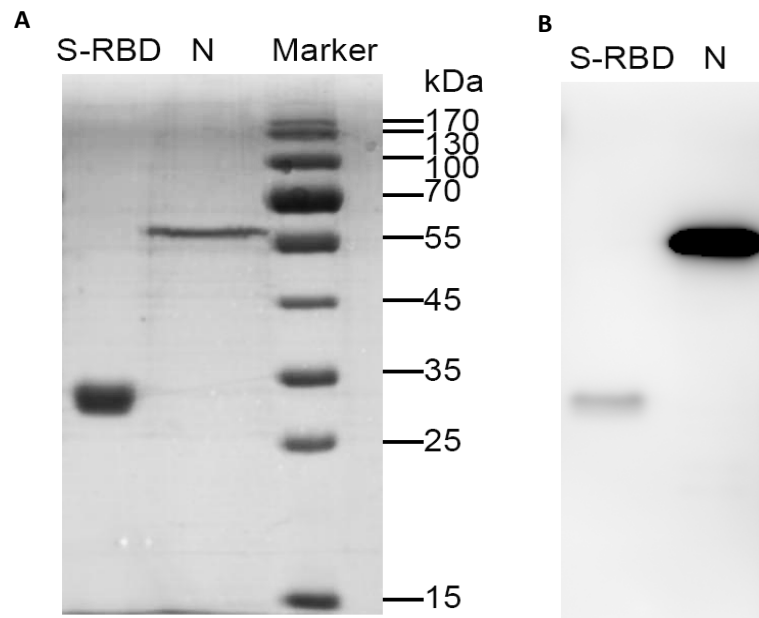

Figure S1. (A) SDS-PAGE gel picture showing the expression of recombinant proteins (S-RBD and NP). (B) Western blotting showing the detection of NP and S-RBD by anti-His antibody. NP, nucleocapsid protein. S-RBD, receptor binding domain of spike protein.
